# Supplementary material
Source: publisher site journal article supplement (https://www.dovepress.com/article/371417)
Supplement: Supplementary file 1 [file get_supplementary_file.php]

**Supplementary materials**

**Health technology assessment (HTA) process for the Universal Health Coverage Scheme (UHCS) in Thailand**

In Thailand, the UHCS has been operating the Universal Health Coverage Benefit Package (UHCBP) Development Project since 2009. The project’s goal is to develop the health benefit package to be covered under the UHCS through a transparent and participatory process involving stakeholders and based on reliable evidence. The following 5 major steps are performed.

First, each stakeholder group, which includes health professionals, academics, patient associations, civic groups, lay citizens, health industry groups, and policymakers, can nominate up to three health topics or technologies. One of them must be associated with health promotion or disease prevention. Health topics must be accompanied by supporting evidence demonstrating their significance, as well as a rationale for submission in accordance with established criteria. Second, health topics are prioritized by a selection working-group based on established criteria including burden of disease, severity of the health problem, effectiveness of intervention, variation in current practice, financial impact of the disease on households and equity and ethical dimensions. Transcatheter aortic valve implantation (TAVI) was a health topic that industrial groups nominated in 2017 and was prioritized as a priority topic that was subjected to a full HTA. Third, the final list of priority topics will be subjected to a full HTA, which will yield information on cost-effectiveness and budget impact. HTA can be carried out by independent research organizations including universities. Fourth, all HTA studies must comply to the SCBP-approved national methodological and process guidelines, including the Thai HTA guideline, to ensure study comparability and transparency. This study was carried out in accordance with the procedure recommended by the SCBP and the Thai HTA Guideline. A stakeholder meeting with interventional cardiologists and thoracic surgeons was held prior to conducting this study to define the scope of the study, validate the model, and provide suggestions for sources of input parameters in the model. Regarding the completion of this study, a stakeholder meeting was scheduled to present the preliminary results of the study. The full report of this study was also reviewed for quality assurance by internal and external reviewers. Finally, the findings of this study were presented to the SCBP, which consist of various stakeholder groups such as patient groups, civil society organizations, providers, relevant government agencies, and subject experts. The SCBP evaluates the findings and makes recommendations to the National Health Security Board (NHSB). The NHSB makes the final decision on whether the intervention should be included in the benefits package.

database searching from inception to JULY 2021
 **850 Web of science**

database searching from inception to JULY 2021
**380 PubMed**

database searching from inception to JULY 2021
**1,154 Embase**

database searching from inception to JULY 2021
**1,220 Scopus**

Duplicate record remove (n =1,938)

## Identification

Records after duplicates removed
(n =1,666)

Records excluded after title or abstract screened n =1,661

Wrong population n=1,049

Wrong publication type n=416

Wrong intervention n=108

Wrong outcome n=87

Not full text available n=1

## Screening

Full-text articles assessed for eligibility
(n =5)

## Eligibility

Full-text articles excluded, with reasons (n = 3)

Same outcomes =2

Early termination n=1

Studies included in qualitative synthesis
(n = 2)

## Included

**Figure S1** PRISMA flow diagram for literature review.
**Notes:** Adapted from: Page MJ, McKenzie JE, Bossuyt PM, Boutron I, et al. The PRISMA 2020 statement: An updated guideline for reporting systematic reviews. *BMJ*. 2021;372:n71. doi:10.1136/bmj.n71. Creative Commons Attribution (CC BY 4.0) license (https://creativecommons.org/licenses/by/4.0/legalcode).
